# Supplementary material for: A Radiomics-Based Machine Learning Model and SHAP for Predicting Spread Through Air Spaces and Its Prognostic Implications in Stage I Lung Adenocarcinoma: A Multicenter Cohort Study
Source: Research Square preprint supplement (doi:10.21203/rs.3.rs-6345504/v1), 2025-05-06

|                                                             |       |       |       |       |
|-------------------------------------------------------------|-------|-------|-------|-------|
| ENR-CV:10 fold (cutoff:0.5, alpha:0.9)                      | 0.801 | 0.866 | 0.831 | 0.849 |
| ENR-CV:10 fold (cutoff:0.5, alpha:0.7)                      | 0.805 | 0.863 | 0.831 | 0.847 |
| Lasso-R-CV:10 fold (cutoff:0.5)                             | 0.792 | 0.859 | 0.831 | 0.845 |
| ENR-CV:10 fold (cutoff:0.5, alpha:0.8)                      | 0.796 | 0.859 | 0.831 | 0.845 |
| ENR-CV:10 fold (cutoff:0.5, alpha:0.6)                      | 0.796 | 0.853 | 0.818 | 0.836 |
| ENR-CV:10 fold (cutoff:0.5, alpha:0.5)                      | 0.796 | 0.843 | 0.805 | 0.824 |
| ENR-CV:10 fold (cutoff:0.5, alpha:0.4)                      | 0.792 | 0.833 | 0.805 | 0.819 |
| ENR-CV:10 fold (cutoff:0.5, alpha:0.3)                      | 0.788 | 0.830 | 0.805 | 0.818 |
| ENR-CV:10 fold (cutoff:0.5, alpha:0.2)                      | 0.788 | 0.820 | 0.792 | 0.806 |
| ENR-CV:10 fold (cutoff:0.5, alpha:0.1)                      | 0.774 | 0.801 | 0.779 | 0.79  |
| SVM-default+Lasso-CV:10 fold (kernel: linear)               | 0.774 | 0.739 | 0.705 | 0.772 |
| SVM-CV:10 fold+Lasso-CV:10 fold (kernel: linear)            | 0.774 | 0.739 | 0.805 | 0.772 |
| StepWise-AIC+LR (cutoff:0.5)                                | 0.773 | 0.771 | 0.753 | 0.762 |
| RR-CV:10 fold (cutoff:0.5)                                  | 0.780 | 0.765 | 0.727 | 0.746 |
| NN-MLP (cutoff:0.75, lr:0.005, bs:32, ep:50, dropout:0.25)  | 0.850 | 0.742 | 0.740 | 0.741 |
| RF (mtry=11, 25%)                                           | 1.000 | 0.752 | 0.727 | 0.739 |
| NN-MLP (cutoff:0.5, lr:0.005, bs:32, ep:50, dropout:0.25)   | 0.898 | 0.739 | 0.740 | 0.739 |
| LR (cutoff:0.5)                                             | 0.823 | 0.706 | 0.766 | 0.736 |
| GBM-default+Lasso-CV:10 fold (cutoff:0.5)                   | 0.845 | 0.725 | 0.740 | 0.733 |
| RF+Lasso-CV:10 fold (mtry=20, 50%)                          | 1.000 | 0.712 | 0.753 | 0.733 |
| LDA+Lasso-CV:10 fold                                        | 0.770 | 0.722 | 0.740 | 0.731 |
| NN-MLP (cutoff:0.75, lr:0.01, bs:160, ep:50, dropout:0.25)  | 0.912 | 0.745 | 0.714 | 0.723 |
| RF+Lasso-CV:10 fold (mtry=30, 75%)                          | 1.000 | 0.719 | 0.727 | 0.73  |
| RF (mtry=30, 75%)                                           | 1.000 | 0.742 | 0.701 | 0.722 |
| RF+Lasso-CV:10 fold (mtry=11, 25%)                          | 1.000 | 0.696 | 0.740 | 0.718 |
| SVM-CV:10 fold+Lasso-CV:10 fold (kernel: polynomial)        | 0.761 | 0.729 | 0.688 | 0.709 |
| NN-MLP (cutoff:0.5, lr:0.01, bs:160, ep:50, dropout:0.25)   | 0.885 | 0.686 | 0.727 | 0.707 |
| LDA                                                         | 0.792 | 0.686 | 0.727 | 0.707 |
| SVM-CV:10 fold+Lasso-CV:10 fold (kernel: radial)            | 0.792 | 0.709 | 0.701 | 0.705 |
| GBM-default (cutoff:0.5)                                    | 0.885 | 0.709 | 0.701 | 0.705 |
| NN-MLP (cutoff:0.75, lr:0.01, bs:32, ep:50, dropout:0.25)   | 0.903 | 0.654 | 0.753 | 0.703 |
| XGBoost-default+Lasso-CV:10 fold (cutoff:0.5)               | 1.000 | 0.654 | 0.753 | 0.703 |
| XGBoost-default+Lasso-CV:10 fold (cutoff:0.75)              | 1.000 | 0.660 | 0.740 | 0.7   |
| NN-MLP (cutoff:0.5, lr:0.005, bs:96, ep:50, dropout:0.5)    | 0.752 | 0.722 | 0.675 | 0.699 |
| StepWise-AIC+LR (cutoff:0.75)                               | 0.721 | 0.657 | 0.740 | 0.699 |
| NN-MLP (cutoff:0.25, lr:0.005, bs:32, ep:50, dropout:0.25)  | 0.881 | 0.680 | 0.714 | 0.697 |
| NN-MLP (cutoff:0.5, lr:0.01, bs:32, ep:50, dropout:0.25)    | 0.925 | 0.680 | 0.714 | 0.697 |
| LR (cutoff:0.75)                                            | 0.739 | 0.680 | 0.714 | 0.697 |
| NN-MLP (cutoff:0.25, lr:0.01, bs:160, ep:50, dropout:0.25)  | 0.867 | 0.627 | 0.766 | 0.697 |
| SVM-CV:10 fold (kernel: radial)                             | 0.783 | 0.676 | 0.714 | 0.695 |
| SVM-default+Lasso-CV:10 fold (kernel: radial)               | 0.792 | 0.673 | 0.714 | 0.694 |
| NN-MLP (cutoff:0.5, lr:0.005, bs:96, ep:50, dropout:0.25)   | 0.863 | 0.683 | 0.701 | 0.692 |
| NN-MLP (cutoff:0.25, lr:0.01, bs:32, ep:50, dropout:0.25)   | 0.903 | 0.657 | 0.727 | 0.692 |
| NN-MLP (cutoff:0.5, lr:0.001, bs:32, ep:50, dropout:0.25)   | 0.779 | 0.673 | 0.701 | 0.687 |
| NN-MLP (cutoff:0.5, lr:0.005, bs:224, ep:50, dropout:0.25)  | 0.805 | 0.673 | 0.701 | 0.687 |
| KNN (k=3)                                                   | 0.803 | 0.634 | 0.720 | 0.686 |
| XGBoost-default (cutoff:0.75)                               | 1.000 | 0.644 | 0.727 | 0.686 |
| SVM-default (kernel: linear)                                | 0.810 | 0.703 | 0.662 | 0.682 |
| SVM-CV:10 fold (kernel: linear)                             | 0.810 | 0.703 | 0.662 | 0.682 |
| GBM-default+Lasso-CV:10 fold (cutoff:0.75)                  | 0.788 | 0.676 | 0.688 | 0.682 |
| SVM-default (kernel: radial)                                | 0.805 | 0.663 | 0.701 | 0.682 |
| SVM-CV:10 fold (kernel: polynomial)                         | 0.774 | 0.683 | 0.675 | 0.679 |
| NN-MLP (cutoff:0.5, lr:0.005, bs:224, ep:50, dropout:0.5)   | 0.867 | 0.667 | 0.688 | 0.677 |
| NN-MLP (cutoff:0.75, lr:0.05, bs:96, ep:50, dropout:0.25)   | 0.805 | 0.641 | 0.714 | 0.677 |
| KNN (k=2)                                                   | 0.845 | 0.618 | 0.740 | 0.677 |
| KNN (k=4)                                                   | 0.819 | 0.584 | 0.766 | 0.677 |
| XGBoost-default+Lasso-CV:10 fold (cutoff:0.25)              | 1.000 | 0.676 | 0.675 | 0.676 |
| NN-MLP (cutoff:0.5, lr:0.001, bs:96, ep:50, dropout:0.5)    | 0.743 | 0.673 | 0.675 | 0.674 |
| RF (mtry=20, 50%)                                           | 0.969 | 0.657 | 0.688 | 0.673 |
| GBM-default (cutoff:0.75)                                   | 0.805 | 0.614 | 0.727 | 0.671 |
| XGBoost-default (cutoff:0.5)                                | 1.000 | 0.663 | 0.675 | 0.669 |
| NN-MLP (cutoff:0.5, lr:0.01, bs:96, ep:50, dropout:0.5)     | 0.832 | 0.660 | 0.675 | 0.668 |
| LR (cutoff:0.25)                                            | 0.805 | 0.634 | 0.701 | 0.668 |
| KNN (k=1)                                                   | 1.000 | 0.582 | 0.753 | 0.667 |
| NN-MLP (cutoff:0.5, lr:0.01, bs:224, ep:50, dropout:0.25)   | 0.792 | 0.670 | 0.662 | 0.666 |
| XGBoost-CV:10 fold (cutoff:0.25)                            | 0.850 | 0.605 | 0.727 | 0.666 |
| XGBoost-default (cutoff:0.25)                               | 1.000 | 0.693 | 0.636 | 0.665 |
| NN-MLP (cutoff:0.5, lr:0.01, bs:160, ep:50, dropout:0.5)    | 0.827 | 0.641 | 0.688 | 0.664 |
| KNN+Lasso-CV:10 fold (k=1)                                  | 1.000 | 0.647 | 0.675 | 0.661 |
| QDA                                                         | 0.920 | 0.634 | 0.688 | 0.661 |
| KNN+Lasso-CV:10 fold (k=5)                                  | 0.841 | 0.621 | 0.701 | 0.661 |
| StepWise-AIC+LR (cutoff:0.25)                               | 0.779 | 0.631 | 0.688 | 0.66  |
| GBM-default (cutoff:0.25)                                   | 0.810 | 0.660 | 0.649 | 0.655 |
| NN-MLP (cutoff:0.5, lr:0.001, bs:96, ep:50, dropout:0.25)   | 0.788 | 0.631 | 0.675 | 0.653 |
| KNN (k=5)                                                   | 0.836 | 0.588 | 0.714 | 0.651 |
| NN-MLP (cutoff:0.5, lr:0.001, bs:160, ep:50, dropout:0.25)  | 0.774 | 0.650 | 0.649 | 0.65  |
| NN-MLP (cutoff:0.5, lr:0.01, bs:96, ep:50, dropout:0.25)    | 0.867 | 0.637 | 0.662 | 0.65  |
| KNN+Lasso-CV:10 fold (k=4)                                  | 0.810 | 0.595 | 0.701 | 0.648 |
| NN-MLP (cutoff:0.5, lr:0.005, bs:160, ep:50, dropout:0.25)  | 0.854 | 0.670 | 0.623 | 0.647 |
| NN-MLP (cutoff:0.5, lr:0.01, bs:32, ep:50, dropout:0.5)     | 0.814 | 0.644 | 0.649 | 0.647 |
| NN-MLP (cutoff:0.5, lr:0.01, bs:224, ep:50, dropout:0.5)    | 0.765 | 0.618 | 0.675 | 0.646 |
| XGBoost-CV:10 fold+Lasso-CV:10 fold (cutoff:0.25)           | 0.717 | 0.618 | 0.675 | 0.646 |
| NN-MLP (cutoff:0.25, lr:0.01, bs:160, ep:50, dropout:0.5)   | 0.805 | 0.592 | 0.701 | 0.646 |
| NN-MLP (cutoff:0.5, lr:0.001, bs:32, ep:50, dropout:0.5)    | 0.752 | 0.676 | 0.610 | 0.643 |
| NN-MLP (cutoff:0.5, lr:0.001, bs:160, ep:50, dropout:0.5)   | 0.757 | 0.637 | 0.649 | 0.643 |
| Lasso-R-CV:10 fold (cutoff:0.75)                            | 0.726 | 0.618 | 0.662 | 0.64  |
| ENR-CV:10 fold (cutoff:0.75, alpha:0.7)                     | 0.726 | 0.618 | 0.662 | 0.64  |
| ENR-CV:10 fold (cutoff:0.75, alpha:0.8)                     | 0.726 | 0.618 | 0.662 | 0.64  |
| ENR-CV:10 fold (cutoff:0.75, alpha:0.9)                     | 0.730 | 0.618 | 0.662 | 0.64  |
| NN-MLP (cutoff:0.5, lr:0.005, bs:160, ep:50, dropout:0.5)   | 0.832 | 0.627 | 0.649 | 0.638 |
| KNN+Lasso-CV:10 fold (k=3)                                  | 0.845 | 0.614 | 0.662 | 0.638 |
| NN-MLP (cutoff:0.75, lr:0.005, bs:96, ep:50, dropout:0.25)  | 0.721 | 0.624 | 0.649 | 0.637 |
| GBM-default+Lasso-CV:10 fold (cutoff:0.25)                  | 0.810 | 0.624 | 0.649 | 0.637 |
| ENR-CV:10 fold (cutoff:0.75, alpha:0.3)                     | 0.704 | 0.618 | 0.649 | 0.633 |
| ENR-CV:10 fold (cutoff:0.75, alpha:0.4)                     | 0.712 | 0.618 | 0.649 | 0.633 |
| ENR-CV:10 fold (cutoff:0.75, alpha:0.5)                     | 0.712 | 0.618 | 0.649 | 0.633 |
| ENR-CV:10 fold (cutoff:0.75, alpha:0.6)                     | 0.712 | 0.618 | 0.649 | 0.633 |
| NN-MLP (cutoff:0.5, lr:0.001, bs:224, ep:50, dropout:0.5)   | 0.646 | 0.618 | 0.636 | 0.627 |
| ENR-CV:10 fold (cutoff:0.75, alpha:0.1)                     | 0.677 | 0.618 | 0.636 | 0.627 |
| ENR-CV:10 fold (cutoff:0.75, alpha:0.2)                     | 0.686 | 0.618 | 0.636 | 0.627 |
| NN-MLP (cutoff:0.25, lr:0.01, bs:224, ep:50, dropout:0.25)  | 0.805 | 0.605 | 0.649 | 0.627 |
| NN-MLP (cutoff:0.25, lr:0.01, bs:96, ep:50, dropout:0.5)    | 0.819 | 0.601 | 0.649 | 0.625 |
| NN-MLP (cutoff:0.25, lr:0.005, bs:96, ep:50, dropout:0.25)  | 0.805 | 0.598 | 0.649 | 0.624 |
| NN-MLP (cutoff:0.5, lr:0.005, bs:160, ep:50, dropout:0.5)   | 0.805 | 0.585 | 0.662 | 0.624 |
| NN-MLP (cutoff:0.75, lr:0.01, bs:96, ep:50, dropout:0.25)   | 0.686 | 0.618 | 0.623 | 0.621 |
| NN-MLP (cutoff:0.5, lr:0.005, bs:32, ep:50, dropout:0.5)    | 0.788 | 0.592 | 0.649 | 0.62  |
| RR-CV:10 fold (cutoff:0.75)                                 | 0.664 | 0.614 | 0.623 | 0.619 |
| NN-MLP (cutoff:0.25, lr:0.01, bs:96, ep:50, dropout:0.25)   | 0.854 | 0.608 | 0.623 | 0.616 |
| NN-MLP (cutoff:0.25, lr:0.01, bs:32, ep:50, dropout:0.5)    | 0.814 | 0.592 | 0.636 | 0.614 |
| NN-MLP (cutoff:0.75, lr:0.001, bs:160, ep:50, dropout:0.25) | 0.588 | 0.601 | 0.623 | 0.612 |
| NN-MLP (cutoff:0.25, lr:0.005, bs:160, ep:50, dropout:0.25) | 0.827 | 0.588 | 0.636 | 0.612 |
| NN-MLP (cutoff:0.5, lr:0.05, bs:160, ep:50, dropout:0.25)   | 0.801 | 0.588 | 0.636 | 0.612 |
| SVM-default (kernel: polynomial)                            | 0.712 | 0.611 | 0.610 | 0.611 |
| NN-MLP (cutoff:0.75, lr:0.005, bs:160, ep:50, dropout:0.25) | 0.602 | 0.598 | 0.623 | 0.611 |
| NN-MLP (cutoff:0.25, lr:0.05, bs:160, ep:50, dropout:0.25)  | 0.801 | 0.582 | 0.636 | 0.609 |
| XGBoost-CV:10 fold+Lasso-CV:10 fold (cutoff:0.5)            | 0.907 | 0.618 | 0.597 | 0.608 |
| SVM-default+Lasso-CV:10 fold (kernel: polynomial)           | 0.717 | 0.605 | 0.610 | 0.607 |
| NN-MLP (cutoff:0.5, lr:0.001, bs:224, ep:50, dropout:0.25)  | 0.770 | 0.588 | 0.623 | 0.606 |
| NaiveBayes+Lasso-CV:10 fold                                 | 0.774 | 0.575 | 0.636 | 0.606 |
| ENR-CV:10 fold (cutoff:0.25, alpha:0.8)                     | 0.770 | 0.562 | 0.649 | 0.606 |
| NN-MLP (cutoff:0.5, lr:0.05, bs:96, ep:50, dropout:0.25)    | 0.867 | 0.624 | 0.584 | 0.604 |
| NN-MLP (cutoff:0.75, lr:0.001, bs:32, ep:50, dropout:0.5)   | 0.588 | 0.598 | 0.610 | 0.604 |
| NN-MLP (cutoff:0.75, lr:0.001, bs:32, ep:50, dropout:0.75)  | 0.588 | 0.598 | 0.610 | 0.604 |
| NN-MLP (cutoff:0.75, lr:0.005, bs:32, ep:50, dropout:0.5)   | 0.588 | 0.598 | 0.610 | 0.604 |
| NN-MLP (cutoff:0.5, lr:0.005, bs:32, ep:50, dropout:0.75)   | 0.588 | 0.598 | 0.610 | 0.604 |
| NN-MLP (cutoff:0.75, lr:0.01, bs:32, ep:50, dropout:0.5)    | 0.588 | 0.598 | 0.610 | 0.604 |
| NN-MLP (cutoff:0.75, lr:0.01, bs:32, ep:50, dropout:0.75)   | 0.588 | 0.598 | 0.610 | 0.604 |
| NN-MLP (cutoff:0.75, lr:0.05, bs:32, ep:50, dropout:0.25)   | 0.588 | 0.598 | 0.610 | 0.604 |
| NN-MLP (cutoff:0.5, lr:0.005, bs:32, ep:50, dropout:0.5)    | 0.588 | 0.598 | 0.610 | 0.604 |
| NN-MLP (cutoff:0.75, lr:0.05, bs:32, ep:50, dropout:0.75)   | 0.588 | 0.598 | 0.610 | 0.604 |
| NN-MLP (cutoff:0.75, lr:0.05, bs:32, ep:50, dropout:0.75)   | 0.588 | 0.598 | 0.610 | 0.604 |
| NN-MLP (cutoff:0.75, lr:0.05, bs:32, ep:50, dropout:0.75)   | 0.588 | 0.598 | 0.610 | 0.604 |
| NN-MLP (cutoff:0.75, lr:0.05, bs:32, ep:50, dropout:0.75)   | 0.588 | 0.598 | 0.610 | 0.604 |
| NN-MLP (cutoff:0.75, lr:0.05, bs:32, ep:50, dropout:0.75)   | 0.588 | 0.598 | 0.610 | 0.604 |
| NN-MLP (cutoff:0.75, lr:0.05, bs:32, ep:50, dropout:0.75)   | 0.588 | 0.598 | 0.610 | 0.604 |
| NN-MLP (cutoff:0.75, lr:0.05, bs:32, ep:50, dropout:0.75)   | 0.588 | 0.598 | 0.610 | 0.604 |
| NN-MLP (cutoff:0.75, lr:0.05, bs:32, ep:50, dropout:0.75)   | 0.588 | 0.598 | 0.610 | 0.604 |
| NN-MLP (cutoff:0.75, lr:0.05, bs:32, ep:50, dropout:0.75)   | 0.588 | 0.598 | 0.610 | 0.604 |
| NN-MLP (cutoff:0.75, lr:0.05, bs:32, ep:50, dropout:0.75)   | 0.588 | 0.598 | 0.610 | 0.604 |
| NN-MLP (cutoff:0.75, lr:0.05, bs:32, ep:50, dropout:0.75)   | 0.588 | 0.598 | 0.610 | 0.604 |
| NN-MLP (cutoff:0.75, lr:0.05, bs:32, ep:50, dropout:0.75)   | 0.588 | 0.598 | 0.610 | 0.604 |
| NN-MLP (cutoff:0.75, lr:0.05, bs:32, ep:50, dropout:0.75)   | 0.588 | 0.598 | 0.610 | 0.604 |
| NN-MLP (cutoff:0.75, lr:0.05, bs:32, ep:50, dropout:0.75)   | 0.588 | 0.598 | 0.610 | 0.604 |
| NN-MLP (cutoff:0.75, lr:0.05, bs:32, ep:50, dropout:0.75)   | 0.588 | 0.598 | 0.610 | 0.604 |
| NN-MLP (cutoff:0.75, lr:0.05, bs:32, ep:50, dropout:0.75)   | 0.588 | 0.598 | 0.610 | 0.604 |
| NN-MLP (cutoff:0.75, lr:0.05, bs:32, ep:50, dropout:0.75)   | 0.588 | 0.598 | 0.610 | 0.604 |
| NN-MLP (cutoff:0.75, lr:0.05, bs:32, ep:50, dropout:0.75)   | 0.588 | 0.598 | 0.610 | 0.604 |
| NN-MLP (cutoff:0.75, lr:0.05, bs:32, ep:50, dropout:0.75)   | 0.588 | 0.598 | 0.610 | 0.604 |
| NN-MLP (cutoff:0.75, lr:0.05, bs:32, ep:50, dropout:0.75)   | 0.588 | 0.598 | 0.610 | 0.604 |
| NN-MLP (cutoff:0.75, lr:0.05, bs:32, ep:50, dropout:0.75)   | 0.588 | 0.598 | 0.610 | 0.604 |
| NN-MLP (cutoff:0.75, lr:0.05, bs:32, ep:50, dropout:0.75)   | 0.588 | 0.598 | 0.610 | 0.604 |
| NN-MLP (cutoff:0.75, lr:0.05, bs:32, ep:50, dropout:0.75)   | 0.588 | 0.598 | 0.610 | 0.604 |
| NN-MLP (cutoff:0.75, lr:0.05, bs:32, ep:50, dropout:0.75)   | 0.588 | 0.598 | 0.610 | 0.604 |
| NN-MLP (cutoff:0.75, lr:0.05, bs:32, ep:50, dropout:0.75)   | 0.588 | 0.598 | 0.610 | 0.604 |
| NN-MLP (cutoff:0.75, lr:0.05, bs:32, ep:50, dropout:0.75)   | 0.588 | 0.598 | 0.610 | 0.604 |
| NN-MLP (cutoff:0.75, lr:0.05, bs:32, ep:50, dropout:0.75)   | 0.588 | 0.598 | 0.610 | 0.604 |
| NN-MLP (cutoff:0.75, lr:0.05, bs:32, ep:50, dropout:0.75)   | 0.588 | 0.598 | 0.610 | 0.604 |
| NN-MLP (cutoff:0.75, lr:0.05, bs:32, ep:50, dropout:0.75)   | 0.588 | 0.598 | 0.610 | 0.604 |
| NN-MLP (cutoff:0.75, lr:0.05, bs:32, ep:50, dropout:0.75)   | 0.588 | 0.598 | 0.610 | 0.604 |
| NN-MLP (cutoff:0.75, lr:0.05, bs:32, ep:50, dropout:0.75)   | 0.588 | 0.598 | 0.610 | 0.604 |
| NN-MLP (cutoff:0.75, lr:0.05, bs:32, ep:50, dropout:0.75)   | 0.588 | 0.598 | 0.610 | 0.604 |
| NN-MLP (cutoff:0.75, lr:0.05, bs:32, ep:50, dropout:0.75)   | 0.588 | 0.598 | 0.610 | 0.604 |
| NN-MLP (cutoff:0.75, lr:0.05, bs:32, ep:50, dropout:0.75)   | 0.588 | 0.598 | 0.610 | 0.604 |
| NN-MLP (cutoff:0.75, lr:0.05, bs:32, ep:50, dropout:0.75)   | 0.588 | 0.598 | 0.610 | 0.604 |
| NN-MLP (cutoff:0.75, lr:0.05, bs:32, ep:50, dropout:0.75)   | 0.588 | 0.598 | 0.610 | 0.604 |
| NN-MLP (c                                                   |       |       |       |       |

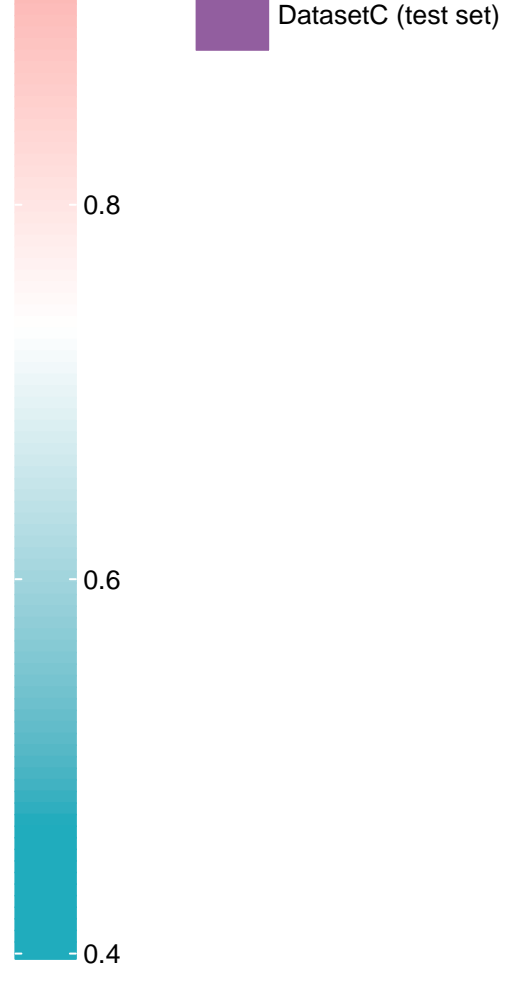

Supplement: Supplementary file 1 [file 385f58e094b3e1db32c1c300.pdf]
